# Supplementary material for: Electrochemical energy storage in Mn2O3 porous nanobars derived from morphology-conserved transformation of benzenetricarboxylate-bridged metal–organic framework
Source: Royal Society of Chemistry journal article supplement (doi:10.1039/c5ce01976a), 2015-12-08
Supplement: c5ce01976a1.pdf [file c5ce01976a1.pdf]

**Electronic Supplementary Information (ESI) for**

**Electrochemical Energy Storage in  $\text{Mn}_2\text{O}_3$  Porous Nanobars Derived from Morphology-Conserved Transformation of Benzenetricarboxylate-bridged Metal-Organic Framework**

Sandipan Maiti, Atin Pramanik and Sourindra Mahanty\*

Fuel Cell & Battery Division

CSIR-Central Glass & Ceramic Research Institute

Kolkata 700032 India

and CSIR-Network Institutes for Solar Energy (NISE), India

---

\*Correspondence to be addressed to: mahanty@cgcricri.res.in; s\_mahanty@hotmail.com

Tel: +91-33-2322 3495 Fax: +91-33-2473 0957

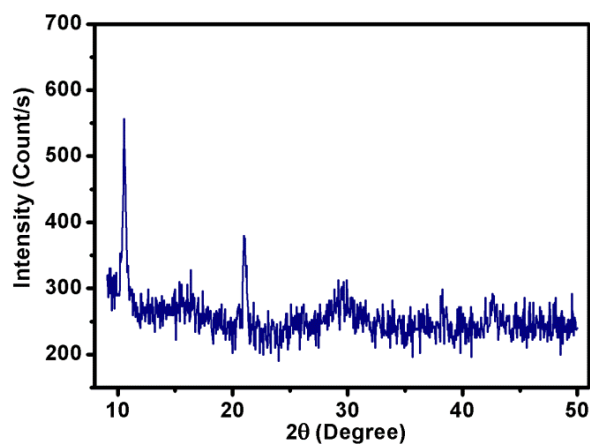

Fig. S1 X-ray diffractogram of the synthesized Mn-BTC MOF. The observed diffractogram matches well to that of  $\text{Mn}(\text{1,3,5-benzenetricarboxylate})_2(\text{H}_2\text{O})_6$  MOF reported by Taylor et al.<sup>S1</sup> and Zheng et al.<sup>S2</sup> confirming formation of Mn-BTC MOF.

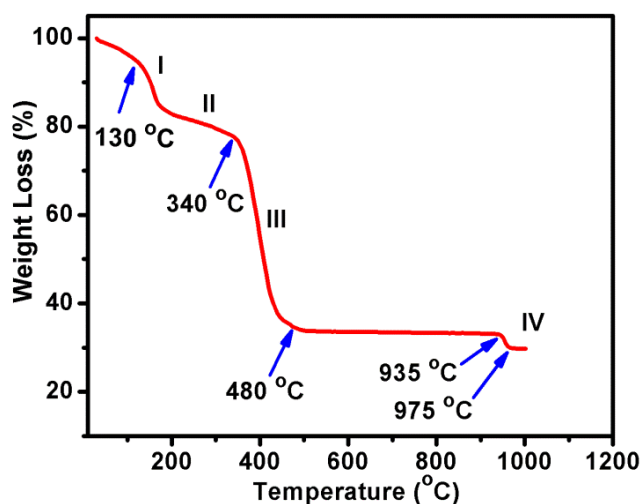

Fig. S2 TGA plot of Mn-BTC MOF performed at constant air ( $\text{O}_2$ ) flow with a heating rate of  $10^\circ\text{C min}^{-1}$ . Four stages of weight loss is observed in the TGA curve. Weight losses up to  $\sim 340^\circ\text{C}$  accounts for the loss of physically adsorbed and chemisorbed water molecules. Breakdown of BTC ligands and conversion to  $\text{Mn}_2\text{O}_3$  accounts for the sharp weight loss between 340 and 480°C. Further small weight loss between 935 and 975°C can be attributed to the transformation from  $\text{Mn}_2\text{O}_3$  to  $\text{Mn}_3\text{O}_4$ .<sup>S3</sup>

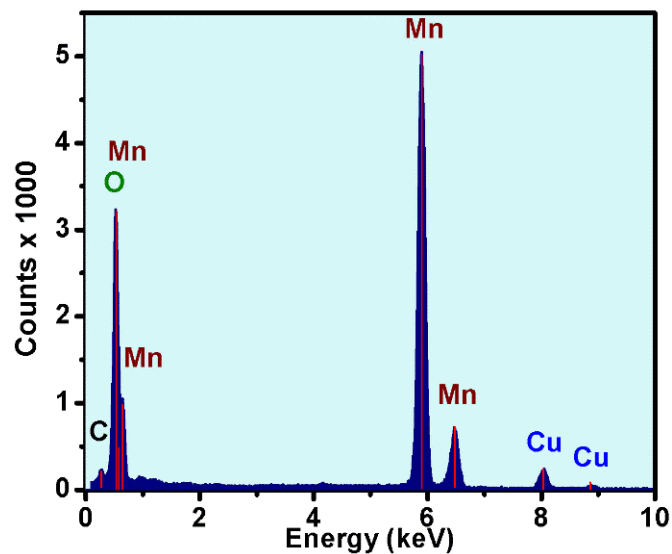

Fig. S3 Energy-dispersive X-ray spectroscopy (EDS) plot of Mn-BTC derived  $\text{Mn}_2\text{O}_3$ . Peaks for Cu and C appear from to the carbon coated TEM grid.

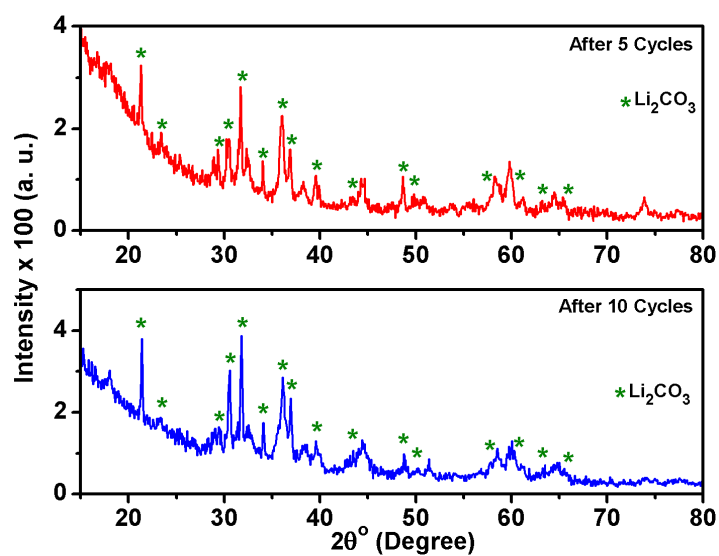

Fig.S4 PXRD patterns of  $\text{Mn}_2\text{O}_3$  electrode after 5 and 10 cycles.

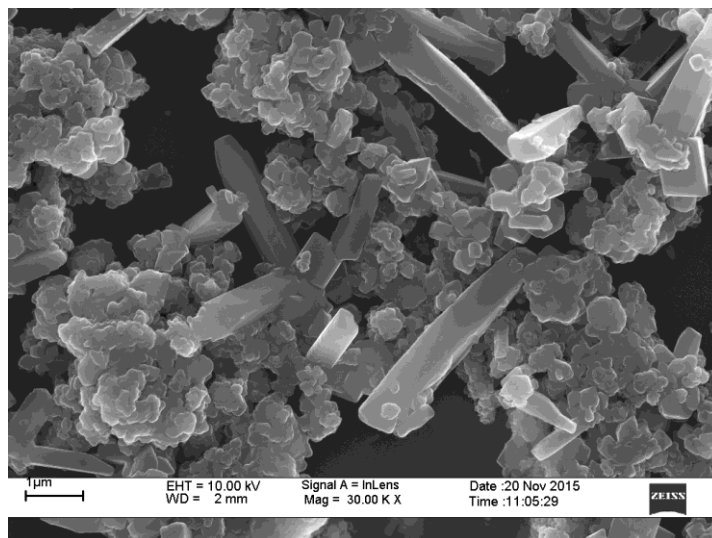

Fig.S5 FESEM micrograph of  $\text{Mn}_2\text{O}_3$  electrode after 10 cycles

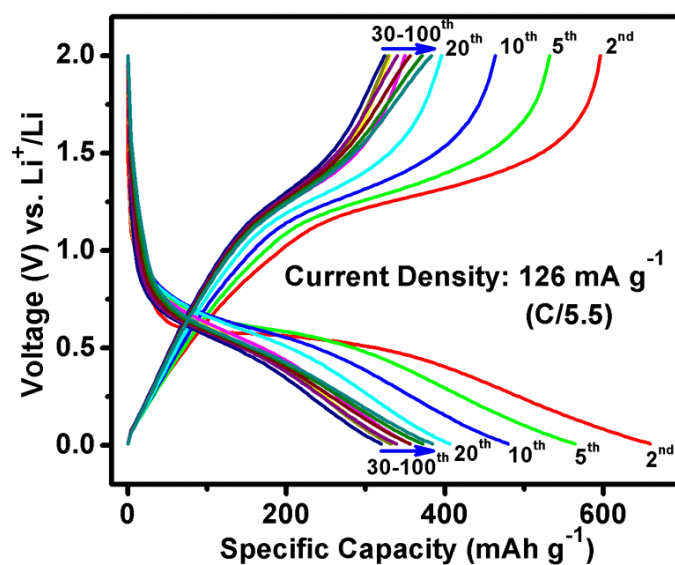

Fig. S6 Galvanostatic discharge-charge profiles of  $\text{Mn}_2\text{O}_3$  at C/5.5 at different cycling intervals between 2<sup>nd</sup> and 100<sup>th</sup> cycle. The capacity decreases for ~40 cycles and then increases again.

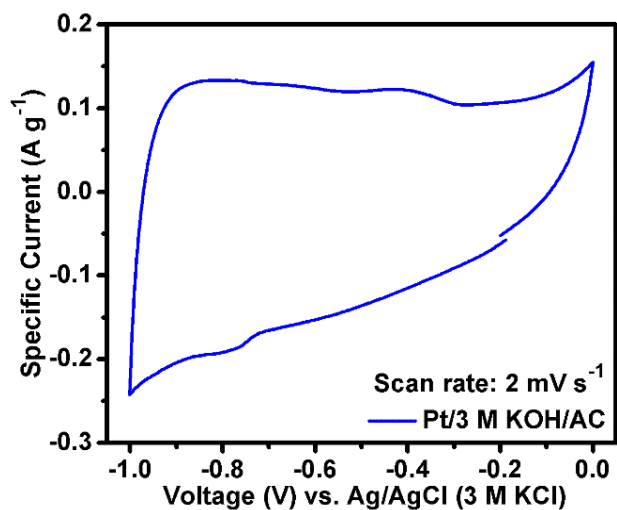

Fig. S7 Cyclic voltammogram of Pt//AC asymmetric supercapacitor cell at a scan rate of  $2 \text{ mV s}^{-1}$

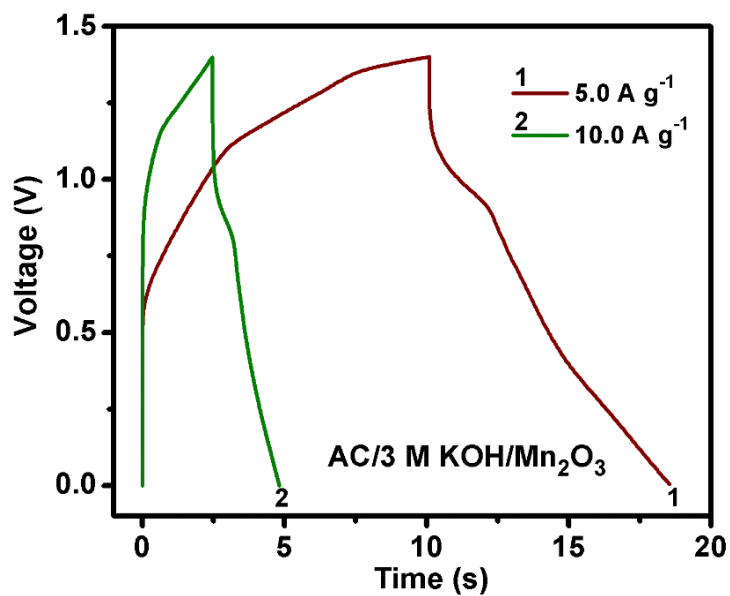

Fig. S8 Galvanostatic charge-discharge profiles of AC// $\text{Mn}_2\text{O}_3$  asymmetric supercapacitor cell at current densities of  $5.0$  and  $10.0 \text{ A g}^{-1}$

## References

- S1 K. M. L. Taylor, W. J. Rieter and W. Lin, *J. Am. Chem. Soc.*, 2008, **130**, 14358-14359.
- S2 F. Zheng, G. Xia, Y. Yang and Q. Chen, *Nanoscale*, 2015, **7**, 9637-9645.
- S3 H.-W. Shim, A.-H. Lim, K.-M. Min and D.-W. Kim, *CrystEngComm*, 2011, **13**, 6747-6752.
